# Supplementary material
Source: publisher figshare collection journal article supplement (https://acs.figshare.com/ndownloader/files/4571167)

## Supporting Information for

### Synthesis and Stereoselective Halogenolysis of Optically Pure Benzylstannanes

José Luis García Ruano,\*<sup>a</sup> José Alemán,<sup>a</sup> Alejandro Parra,<sup>a</sup> Ana Alcudia,<sup>b</sup> Celia Maya<sup>c</sup>

<sup>a</sup> Prof. Dr. J. L. García Ruano, Dr. J. Alemán, A. Parra. Departamento de Química Orgánica, Facultad de Ciencias, Universidad Autónoma de Madrid. Cantoblanco, 28049-Madrid, Spain.

<sup>b</sup> Dr. Ana Alcudia. Departamento de Química Orgánica y Farmaceútica. Facultad de Farmacia, Universidad de Sevilla. c/ Prof. García González nº 2, 41012-Sevilla, Spain

<sup>c</sup> Dr. Celia Maya. Departamento de Química Inorgánica. Facultad de Farmacia, Universidad de Sevilla. c/ Prof. García González, 41012-Sevilla, Spain

|                                    |          |
|------------------------------------|----------|
| General Methods                    | page S2  |
| Synthesis of compounds <b>3-11</b> | page S2  |
| NMR-Spectra                        | page S10 |

**General Method:** NMR spectra were acquired on a 200 and 300 spectrometer, running at 200 or 300 and 50, 75 MHz for  $^1\text{H}$  and  $^{13}\text{C}$ , respectively. Chemical shifts ( $\delta$ ) are reported in ppm relative to residual solvent signals ( $\text{CHCl}_3$ , 7.26 ppm for  $^1\text{H}$ -NMR,  $\text{CDCl}_3$ , 77.0 ppm for  $^{13}\text{C}$  NMR).  $^{13}\text{C}$ -NMR spectra were acquired on a broad band decoupled mode. All reactions were carried out in anhydrous solvents and under argon atmosphere. THF and  $\text{Et}_2\text{O}$  were distilled from sodium-benzophenone under argon and  $\text{CH}_2\text{Cl}_2$  was distilled from  $\text{P}_2\text{O}_5$ . Flash column chromatography was performed using silica gel Merk-60 (230-400 mesh). *n*-BuLi (2.5M solution in hexanes) and *m*-CPBA were purchased from a commercial source.

**Materials.** Commercially available starting materials and solvents were used without further purification. Sulfoxides **1**, **2** were described before.<sup>1</sup>

**General procedure for synthesis of compounds 3, 4 and 5. Compounds of the Table 1.**

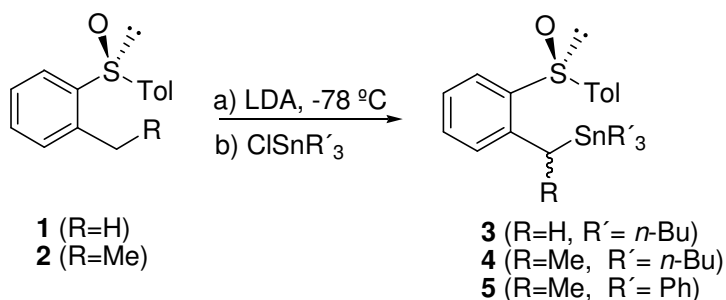

A solution of *n*-BuLi (0.6 mmol, 2.3 M in hexane) was added to *i*Pr<sub>2</sub>NH (0.9 mmol) in THF (3 mL) at 0 °C. After stirring for 20 min, the mixture was cooled to -78 °C. A solution of the corresponding (*S*)-sulfoxide **1** or **2** (0.5 mmol) in THF (2 mL) was added. After stirring for 30 min, the corresponding tin chloride (1.5 mmol) was added at -78 °C. When the reaction was completed (20-30 min), the mixture was hydrolysed (saturated  $\text{NH}_4\text{Cl}$ ), extracted (3x10 mL  $\text{Et}_2\text{O}$ ), washed (2x10 mL

<sup>1</sup> a) J. L. García Ruano, J. Alemán, J. F. Soriano *Org. Lett.* **2003**, 5, 677; b) J. L. García Ruano, J. Alemán *Org. Lett.* **2003**, 5, 4513. c) García Ruano, J. L.; Alemán, J.; Aranda, M.; Arévalo, M. J.; Padwa, A. *Org. Lett.* **2005**, 7, 19.

NH<sub>4</sub>Cl sat.), dried (MgSO<sub>4</sub>) and the solvent was removed under reduced pressure. Compounds were purified by flash silica gel column chromatography (eluent and yield were indicated in every case).

**(Ss)-Tributyl[2-(*p*-tolylsulfinyl)benzyl]stannane (3).** The reaction was carried out using (*S*)-

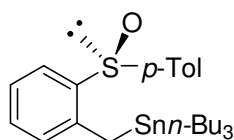

sulfoxide **1** and tributyltin chloride. The residue was purified by flash-column chromatography (15:1 *n*-hexanes/EtOAc) giving a colorless oil. Yield= 92%. IR

(NaCl): 2923, 1588, 1492, 1464, 1084, 1034 cm<sup>-1</sup>. <sup>1</sup>H-NMR (200 MHz): δ 7.84

(dd, *J* = 6.8, 1.2 Hz, 1H), 7.46 (d, *J* = 8.4 Hz, 2H), 7.30-7.10 (m, 4H), 6.95 (d, *J* = 6.8 Hz, 1H), 2.35

(s, 3H), 2.29 (d, *J* = 12.0 Hz, 1H), 2.20 (d, *J* = 12.0 Hz, 1H), 1.44-1.30 (m, 6H), 1.29-1.10 (m, 12H),

0.84 (m, 9H). <sup>13</sup>C-NMR (50 MHz): δ 142.4, 141.5, 141.4, 138.9, 130.7, 129.9, 128.6, 126.2, 124.6,

124.0, 28.8, 27.7, 27.2, 13.6, 13.5, 10.1. [α]<sub>D</sub><sup>20</sup>: -269.3 (*c* 1.0, CHCl<sub>3</sub>). Anal. Calcd for C<sub>28</sub>H<sub>27</sub>NOS: C,

79.02; H, 6.39; N, 3.29; S, 7.53. Found: C, 78.56; H, 6.39; N, 3.29; S, 7.53.

**(Ss,*R*)-Tributyl-{1-[2-(*p*-tolylsulfinyl)phenyl]ethyl}stannane (4A).** This product was obtained as

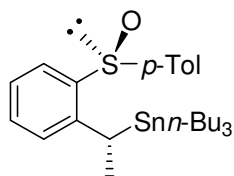

major diastereoisomer using (*S*)-sulfoxide **2** and tributyltin chloride. The residue

was purified by flash-column chromatography (25:1 *n*-hexanes/EtOAc) giving a colorless oil. Yield= 70%. IR (NaCl): 2956, 2925, 1641, 1464 cm<sup>-1</sup>. <sup>1</sup>H-NMR (300

MHz): δ 7.94 (dd, *J* = 7.8, 1.5 Hz, 1H), 7.45-7.41 (m, 2H), 7.36 (dt, *J* = 7.4, 1.4 Hz, 1H), 7.24-7.20 (m,

3H), 7.10 (dd, *J* = 7.8, 1.2 Hz, 1H), 2.70 (q, *J* = 7.5 Hz, 1H), 2.34 (s, 3H), 1.45-1.19 (m, 18H), 0.92 (d,

*J* = 7.5 Hz, 3H), 0.85 (t, *J* = 7.3 Hz, 9H). <sup>13</sup>C-NMR (75 MHz): δ 146.9, 142.3, 141.6, 139.1, 130.9,

130.0, 126.2, 125.7, 124.4, 123.9, 29.0, 27.3, 23.1, 21.4, 16.9, 13.7, 9.4. [α]<sub>D</sub><sup>20</sup>: -258.8 (*c* 1.8, CHCl<sub>3</sub>).

Anal. Calcd for C<sub>27</sub>H<sub>42</sub>OSSn: C, 60.80%; H, 7.94%; S, 6.01%; Found: C, 60.24%; H, 7.44%; S,

5.79%.

**(Ss,S)-Tributyl-{1-[2-(*p*-tolylsulfinyl)phenyl]ethyl}stannane (4B).** This product was obtained as minor diastereoisomer using (*S*)-sulfoxide **2** and tributyltin chloride. The residue

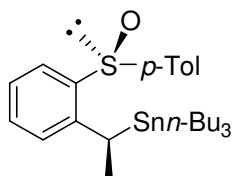

was purified by flash-column chromatography (25:1 *n*-hexanes/EtOAc) giving a colorless oil. Yield= 12%. <sup>1</sup>H-NMR (300 MHz): δ 7.80 (dd, *J* = 7.7, 1.7 Hz, 1H), 7.48 (d, *J* = 7.8 Hz, 2H), 7.36 (m, 1H), 7.26 (m, 1H), 7.23 (d, *J* = 7.8 Hz, 2H), 7.13 (d, *J* = 7.7 Hz, 1H), 3.02 (q, *J* = 7.3 Hz, 1H), 2.37 (s, 3H), 1.63 (m, 2H), 1.50 (d, *J* = 7.3 Hz, 3H), 1.42-0.54 (m, 25H). <sup>13</sup>C-NMR (75 MHz): δ 149.1, 141.5, 141.3, 139.6, 131.1, 129.9, 128.1, 126.3, 125.6, 124.5, 28.9, 27.8, 27.3, 26.8, 22.8, 21.3, 19.5, 17.8, 13.6, 9.4. [α]<sub>D</sub><sup>20</sup>: -135.8 (*c* 1.0, CHCl<sub>3</sub>).

**(Ss,R)-Triphenyl-{1-[2-(*p*-tolylsulfinyl)phenyl]ethyl}stannane (5A).** This product was obtained as major diastereoisomer using (*S*)-sulfoxide **2** and triphenyltin chloride. The residue

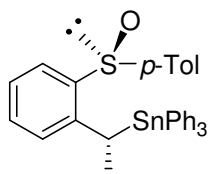

was purified by flash-column chromatography (20:1 *n*-hexanes/EtOAc) giving a colorless oil. Yield= 74%. <sup>1</sup>H-NMR (300 MHz): δ 7.77 (d, *J* = 7.8 Hz, 1H), 7.46-7.41 (m, 20H), 7.35 (d, *J* = 7.4, 2H), 2.71 (q, *J* = 7.4 Hz, 1H), 2.32 (s, 3H), 1.45-1.19 (m, 18H), 0.46 (d, *J* = 7.5 Hz, 3H). <sup>13</sup>C-NMR (75 MHz): δ 142.4, 141.8, 140.3, 137.4, 137.2, 136.9, 131.1, 130.1, 128.9, 128.4, 127.1, 126.4, 125.5, 124.4, 25.6, 21.4, 17.8. [α]<sub>D</sub><sup>20</sup>: -224.8 (*c* 1.0, CHCl<sub>3</sub>). MS (Electrospray) *m/z* 517 (100), 516 (39), 515 (72), 513 (34), 149 (12); HRMS calcd for C<sub>33</sub>H<sub>30</sub>OSSn [M+Na]: 617.0921, found 617.0931.

**(Ss,S)-Triphenyl-{1-[2-(*p*-tolylsulfinyl)phenyl]ethyl}stannane (5B).** This product was obtained as

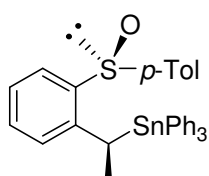

minor diastereoisomer using (*S*)-sulfoxide **2** and triphenyltin chloride. The residue was purified by flash-column chromatography (20:1 *n*-hexanes/EtOAc) giving a colorless oil. Yield= 10%. <sup>1</sup>H-NMR (300 MHz): δ 7.45 (d, *J* = 7.8, 1H), 7.27-7.14 (m, 18H), 6.98 (d, *J* = 8.1 Hz, 2H), 6.80 (d, *J* = 7.9 Hz, 2H), 3.85 (q, *J* = 7.2 Hz, 1H), 2.12 (s, 3H),

1.63 (d,  $J = 7.5$  Hz, 3H).  $^{13}\text{C}$ -NMR (75 MHz):  $\delta$  147.1, 141.0, 140.8, 140.9, 139.9, 136.9, 131.5, 129.7, 128.9, 128.6, 128.4, 128.1, 126.2, 125.7, 25.4, 21.3, 19.5.  $[\alpha]_{\text{D}}^{20}$ : -10.4 ( $c$  0.7,  $\text{CHCl}_3$ ). MS (Electrospray)  $m/z$  517 (100), 516 (39), 515 (72), 513 (34), 149 (12); HRMS calcd for  $\text{C}_{33}\text{H}_{30}\text{OSSn}$   $[\text{M}+\text{Na}]$ : 617.0921, found 617.0927.

**General procedure for synthesis of compounds 6 and 7 (Tables 2). Compounds of Table 2.**

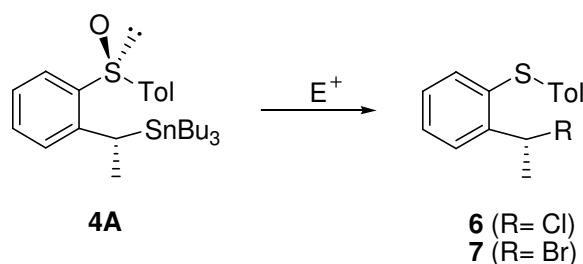

To a solution of the sulfoxide **4A** (0.2 mmol) in  $\text{CH}_2\text{Cl}_2$  was added the corresponding halogenated compound (0.9 mmol) to the indicated temperature (for conditions, see table 2). When the reaction was completed (20-30 min), the solvent was removed under reduced pressure. Compounds were purified by flash silica gel column chromatography (eluent and yield were indicated in every case).

**[2-(1-Chloroethyl)phenyl](*p*-tolyl)sulfane (6).** The residue was purified by flash-column

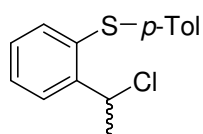

chromatography (50:1 *n*-hexanes/EtOAc) giving a colorless oil. Yield= 72%.

Enantiomeric ratio was determinate by HPLC using a Chiralpak AD column [*n*-hexane/*i*-PrOH (100:0)]; flow rate 0.1 mL/min;  $\tau_{\text{R}} = 35.0$  min (major enantiomer),  $\tau_{\text{R}}$

= 44.5 min (minor enantiomer). IR (NaCl): 1491, 1467, 1437, 1043  $\text{cm}^{-1}$ .  $^1\text{H}$ -NMR (300 MHz):  $\delta$  7.66 (d,  $J = 8.0$  Hz, 1H), 7.32 (td,  $J = 7.2, 1.2$  Hz, 1H), 7.27-7.14 (m, 4H), 7.10 (d,  $J = 8.8$  Hz, 2H), 5.78 (q,  $J = 6.8$  Hz, 1H), 2.31 (s, 3H), 1.77 (d,  $J = 6.8$  Hz, 3H).  $^{13}\text{C}$ -NMR (75 MHz):  $\delta$  143.5, 137.1, 133.6,

132.8, 130.8, 130.1 (2C), 128.7, 128.1, 127.2, 55.3, 26.2, 21.1. Anal. Calcd for C<sub>15</sub>H<sub>15</sub>ClS: C, 68.55%; H, 5.75%; Found: C, 68.78%, H, 5.41%.

**[2-(1-Bromoethyl)phenyl](*p*-tolyl)sulfane (7).** The residue was purified by flash-column

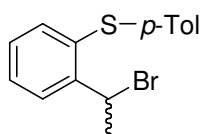

chromatography (100:1 *n*-hexanes/EtOAc) giving a colorless oil. Yield= 42%.

Enantiomeric ratio (ee= 1%) was determinate by HPLC using a Chiralpak AD column [*n*-hexane/*i*-PrOH (100:0)]; flow rate 0.1 mL/min;  $\tau_R$  = 44.0 min (major enantiomer),  $\tau_R$  = 54.4 min (minor enantiomer). IR (NaCl): 2920, 1587, 1490, 1435, 809 cm<sup>-1</sup>. <sup>1</sup>H-

NMR (300 MHz):  $\delta$  7.67 (dd,  $J$  = 7.6, 0.8 Hz, 1H), 7.30 (td,  $J$  = 6.8, 1.6 Hz, 1H), 7.25-7.14 (m, 4H), 7.11 (d,  $J$  = 8.0 Hz, 2H), 5.88 (q,  $J$  = 6.8 Hz, 1H), 2.33 (s, 3H), 2.01 (d,  $J$  = 6.8 Hz, 3H). <sup>13</sup>C-NMR (75 MHz):  $\delta$  143.5, 137.3, 134.1, 132.7, 131.7, 131.2, 130.1, 128.8, 128.0, 127.5, 46.0, 26.4, 21.1. Anal. Calcd for C<sub>15</sub>H<sub>15</sub>BrS: 58.64%; H, 4.92%; S, 10.44%; Found: C, 58.40%; H, 5.05%; S 10.42%.

**General procedure for synthesis of bromide compounds 8 and 9 (Scheme 4 and Tables 3).** To a solution of the sulfoxide **3**, **4** or **5** (0.2 mmol) in CCl<sub>4</sub> in the absence of light was added the corresponding halogenated compound (0.9 mmol) at the indicated temperature (see Scheme 4 and Table 3). When the reaction was completed (20-30 min), MeOH and KF (1000 mg) were added. A white precipitate appeared which was filtered through celite. The solvent was removed under reduced pressure. Compounds were purified by flash silica gel column chromatography (eluent and yield were indicated in every case).

#### Compound of Scheme 4.

**(Ss)-1-(Bromomethyl)-2-(*p*-tolylsulfinyl)benzene (8).** The residue was purified by flash-column

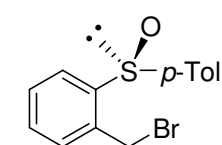

chromatography (2:1 *n*-hexanes/EtOAc) giving a colorless oil. Yield= 78%. <sup>1</sup>H-

NMR (200 MHz):  $\delta$  7.81 (m, 1H), 7.51 (d,  $J$  = 7.9 Hz, 1H), 7.45-7.33 (m, 4H), 7.20

(d,  $J$  = 7.9 Hz, 2H), 4.60 (d,  $J$  = 10.9 Hz, 2H), 2.29 (s, 3H). <sup>13</sup>C-NMR (50 MHz):  $\delta$  143.8, 141.5, 140.8,

135.7, 131.3, 130.9, 129.8, 129.6, 125.7, 125.3, 28.0, 21.1.  $[\alpha]_D^{20}$ : - 110.7 (*c* 1.3, HCCl<sub>3</sub>). Anal. Calcd

for C<sub>14</sub>H<sub>13</sub>OBrS: C, 54.38%; H, 4.24%. Found: C, 55.10%; H, 4.53%.

**(Ss)-1-[(*R*)-1-Bromoethyl]-2-(*p*-tolylsulfinyl)benzene (9A).** The residue was purified by flash-

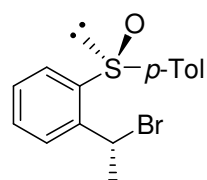

column chromatography (6:1 *n*-hexanes/EtOAc) giving a colorless oil. Yield= 50-90.

IR(NaCl): 2920, 1587, 1490, 1435, 809 cm<sup>-1</sup>. <sup>1</sup>H-NMR (300 MHz):  $\delta$  7.88 (d,  $J$  = 9.3

Hz, 1H), 7.60 (d,  $J$  = 9.0 Hz, 1H), 7.50-7.35 (m, 4H), 7.18 (d,  $J$  = 8.0 Hz, 2H), 5.45

(q,  $J$  = 6.6 Hz, 1H), 2.28 (s, 3H). 1.70 (d,  $J$  = 6.6 Hz, 3H). <sup>13</sup>C-NMR (75 MHz): 141.9, 141.7, 141.4,

141.2, 131.8, 131.2, 129.2, 128.7, 125.9, 125.0, 41.9, 26.6, 21.2.  $[\alpha]_D^{20}$ : -137.4 (*c* 1.0, HCCl<sub>3</sub>). EM

(FAB) *m/z*: 325 (M+1, 31), 245 (50), 244 (51), 243 (100), 225 (41), 132 (29).

**(Ss)-1-[(*S*)-1-Bromoethyl]-2-(*p*-tolylsulfinyl)benzene (9B).** The residue was purified by flash-column

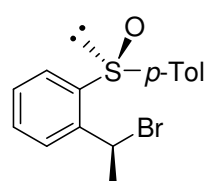

chromatography (6:1 *n*-hexanes/EtOAc) giving a colorless oil. Yield= 8-30%. <sup>1</sup>H-

NMR (300 MHz):  $\delta$  7.78 (d,  $J$  = 9.3 Hz, 1H), 7.72 (d,  $J$  = 9.0 Hz, 1H), 7.50-7.35 (m,

4H), 7.28 (d,  $J$  = 8.0 Hz, 2H), 5.82 (q,  $J$  = 6.6 Hz, 1H), 2.28 (s, 3H), 2.05 (d,  $J$  = 6.6

Hz, 3H). <sup>13</sup>C-NMR (75 MHz):  $\delta$  142.5, 141.8, 141.6, 141.1, 131.9, 130.0, 129.7, 127.8, 125.6, 125.4,

42.8, 26.9, 21.2.  $[\alpha]_D^{20}$ : -84.0 (*c* 1.0, HCCl<sub>3</sub>).

**General procedure for synthesis of bromide compounds (*R*)-10, (*S*)-10 and 11. Compound of Scheme 5 and 6**

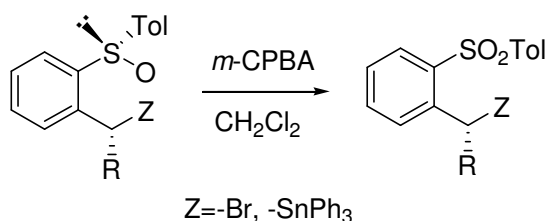

To a solution of the sulfoxide **9A**, **9B** or **5A** (0.2 mmol) in CH<sub>2</sub>Cl<sub>2</sub> (1.5 mL) in the absence of light was added *m*-CPBA (0.22 mmol) at room temperature. When the reaction was completed (checked by TLC), 5 mL of 40% sodium bisulfite were added and the mixture was stirred for 5 min. The reaction solution was extracted with CH<sub>2</sub>Cl<sub>2</sub> (3x20 mL), the organic phase was washed with saturated solution of NaHCO<sub>3</sub> (2x40 mL), dried (Na<sub>2</sub>SO<sub>4</sub>) and concentrated. The corresponding sulfones was purified by column chromatography (eluent and yield was indicate each case).

**(*R/S*)-1-(1-Bromoethyl)-2-tosylbenzene [(*R*)-10/(*S*)-10].** The residue was purified by flash-column

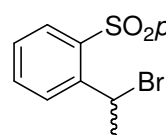

chromatography (3:1 *n*-hexanes/EtOAc) giving a white solid. mp: 121-123°C.

Yield= 92%. <sup>1</sup>H-NMR (300 MHz): δ 8.11 (dd, *J* = 9.3, 1.9, 1H), 7.83 (dd, *J* = 8.1, 2.0 Hz, 1H), 7.75 (d, *J* = 7.8 Hz, 2H), 7.61 (t, *J* = 7.8 Hz, 1H), 7.45 (td, *J* = 8.1, 1.5 Hz, 1H), 7.32 (d, *J* = 7.8 Hz, 2H), 6.06 (q, *J* = 6.6 Hz, 1H), 2.41 (s, 3H), 1.86 (d, *J* = 6.6 Hz, 3H). <sup>13</sup>C-NMR (75 MHz): δ 134.1, 130.7, 129.9 (2C), 128.9(2C), 128.4 (2C), 127.5, 42.7, 27.7, 21.6. [α]<sub>D</sub><sup>20</sup> (**(*R*)-10**): -6.3 (c 1.0, HCCl<sub>3</sub>); [α]<sub>D</sub><sup>20</sup> (**(*S*)-10**): +6.8 (c 1.0, HCCl<sub>3</sub>).



**(R)-Triphenyl(1-(2-tosylphenyl)ethyl)stannane [(R)-11]**. The residue was purified by flash-column

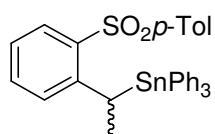

chromatography (2:1 *n*-hexanes/EtOAc) giving a white solid. mp: 139-141°C.

Yield= 96%. <sup>1</sup>H-NMR (300 MHz): δ 7.80(dd, *J* = 6.7, 1.3 Hz, 1H), 7.43 (d, *J* = 8.3

Hz, 2H), 7.30-7.21 (m, 18H), 7.00 (d, *J* = 7.9 Hz, 2H), 4.06 (q, *J* = 7.4 Hz, 1H), 2.25 (s, 3H), 1.50 (d, *J*

= 7.4 Hz, 3H). <sup>13</sup>C-NMR (75 MHz): δ 148.0, 143.7, 138.4, 138.3, 137.4, 136.9, 136.7, 136.4, 133.4,

129.6, 128.8, 128.7, 127.4, 124.4, 26.9, 21.5, 18.7. [α]<sub>D</sub><sup>20</sup>: - 15.7 (c 0.75, HCCl<sub>3</sub>); HRMS calcd for

C<sub>33</sub>H<sub>30</sub>O<sub>2</sub>SSn

[M-C<sub>6</sub>H<sub>5</sub>]:

533.0597,

found

533.0604.

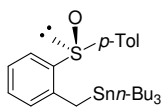

**3**

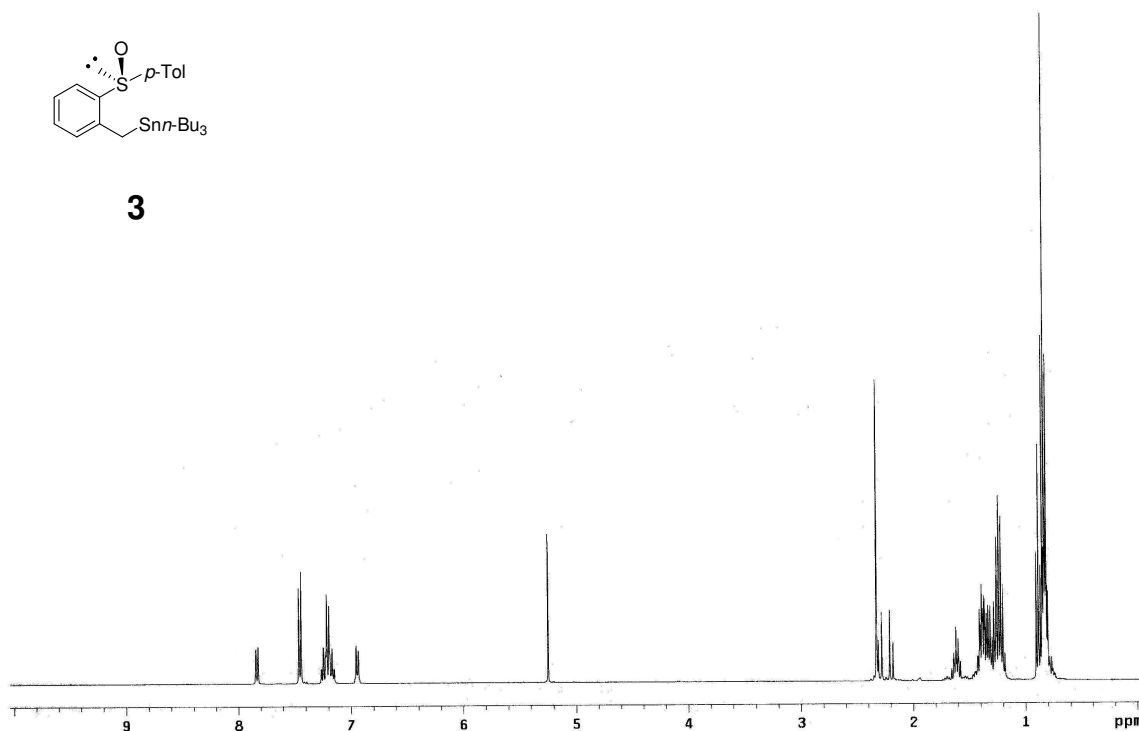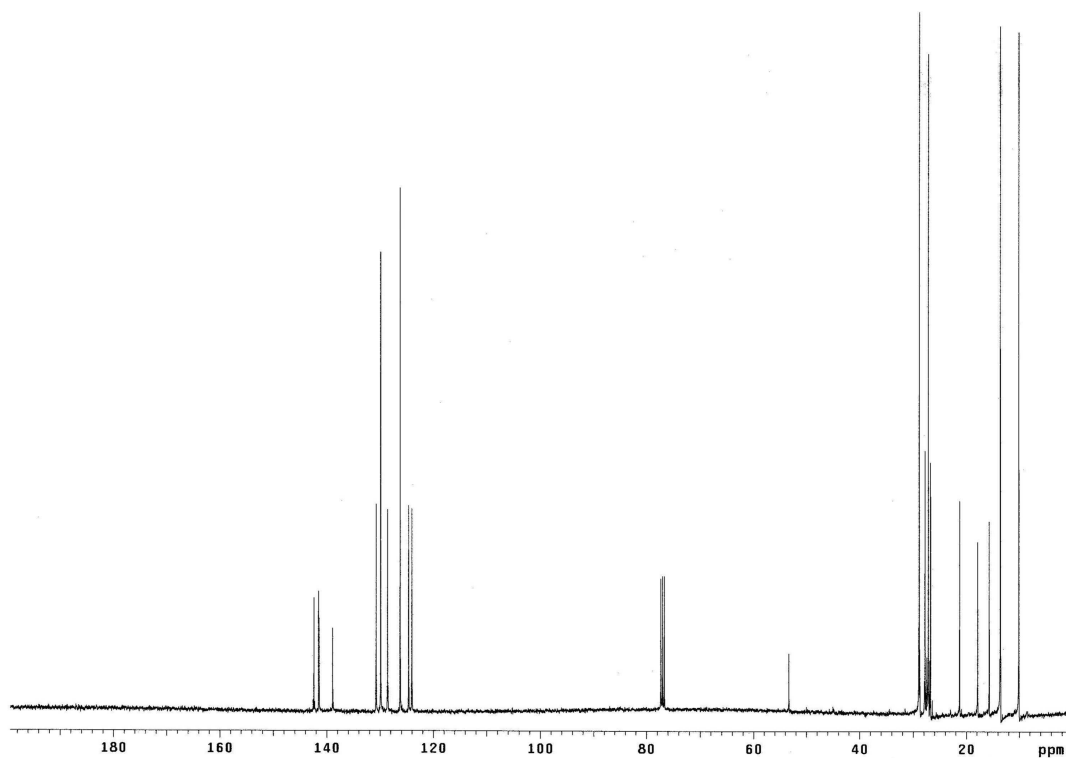

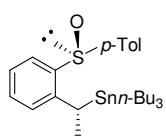

**4A**

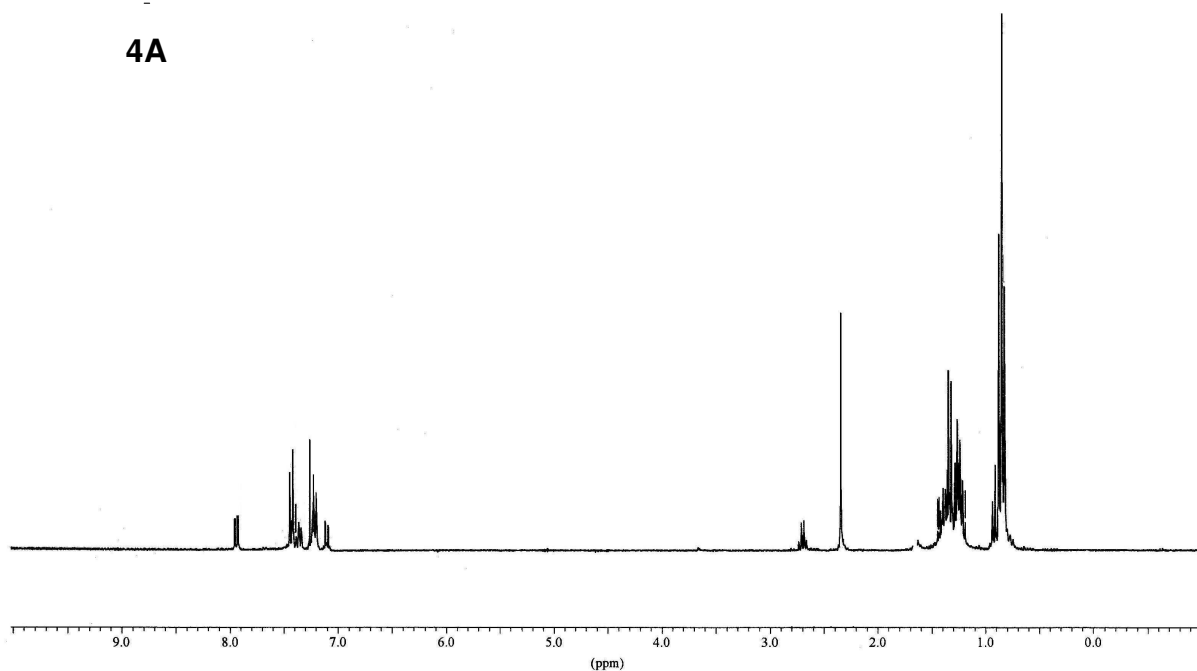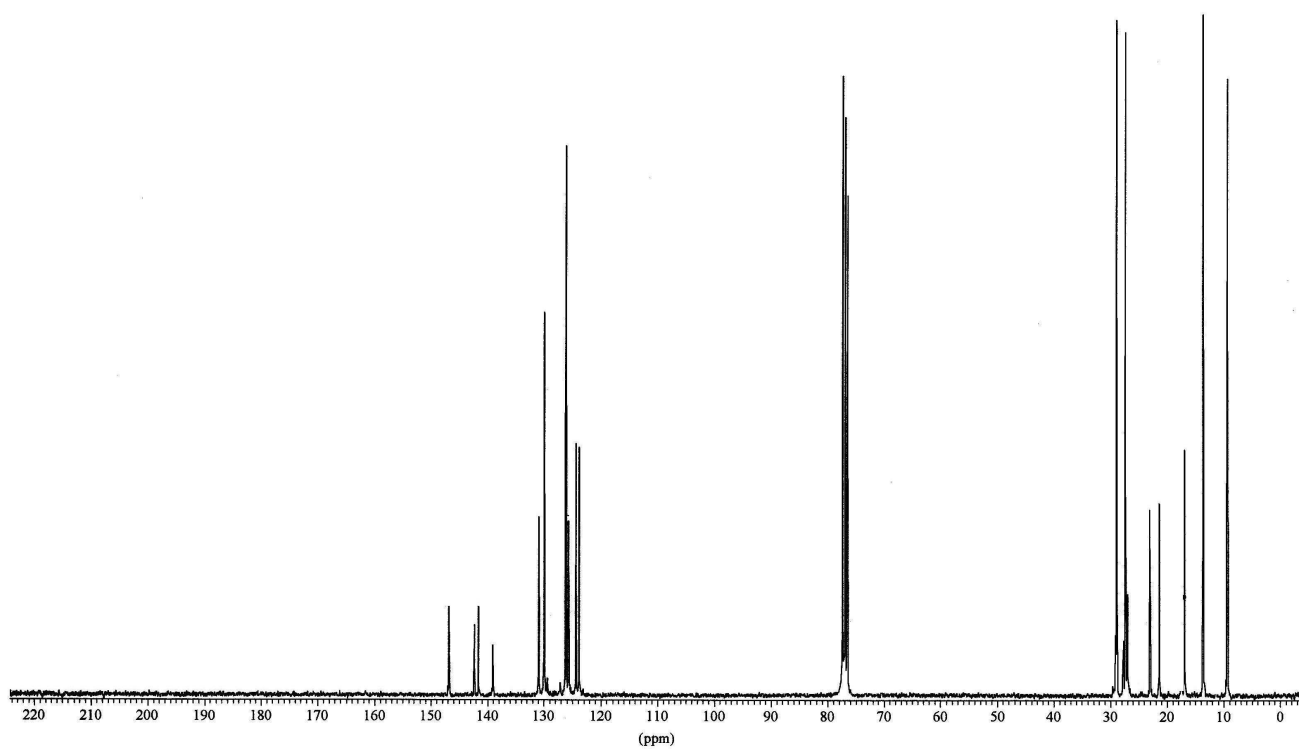

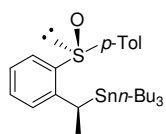

**4B**

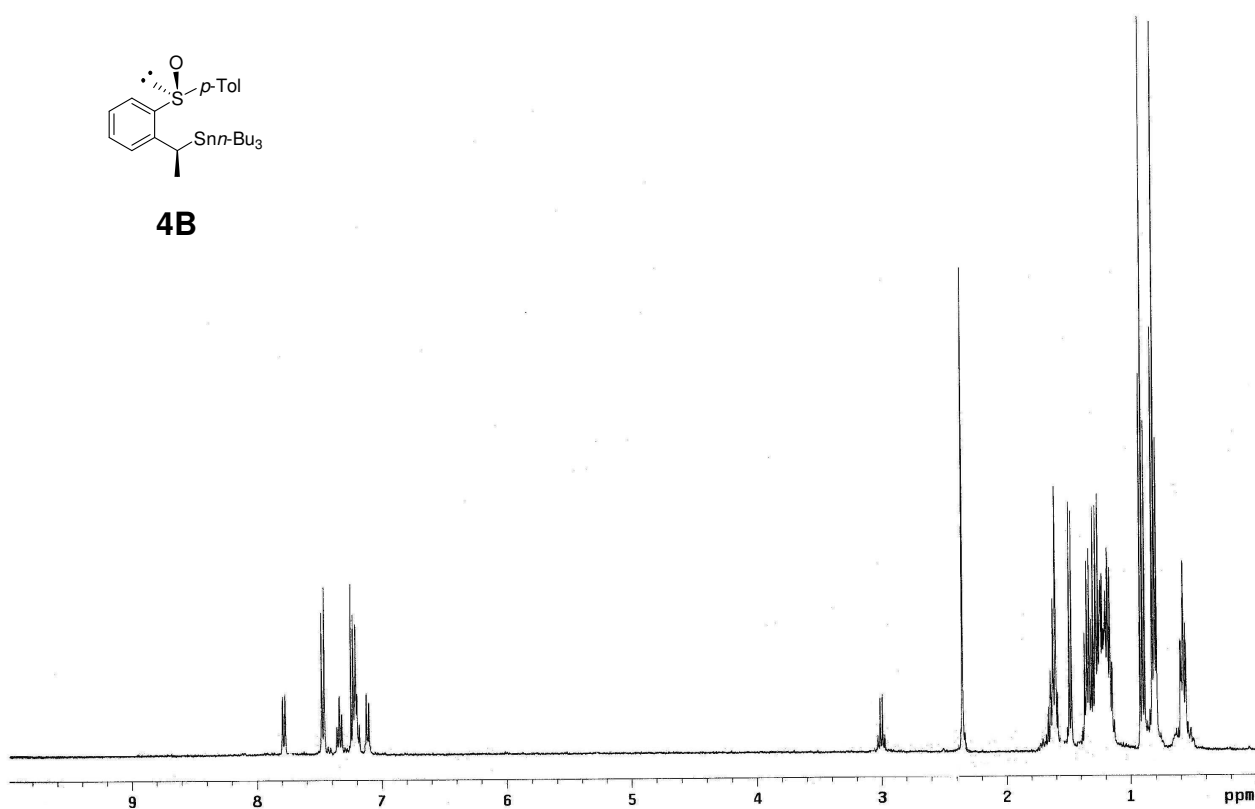

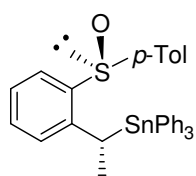

**5A**

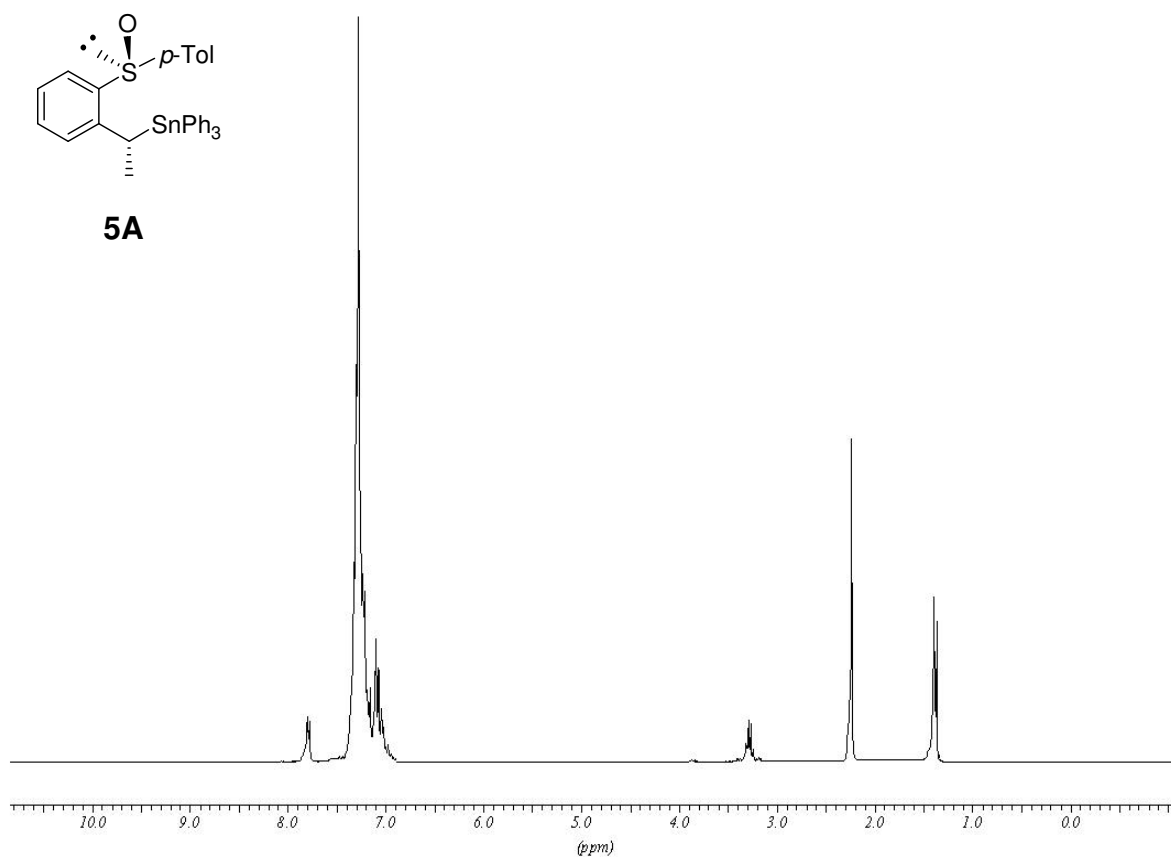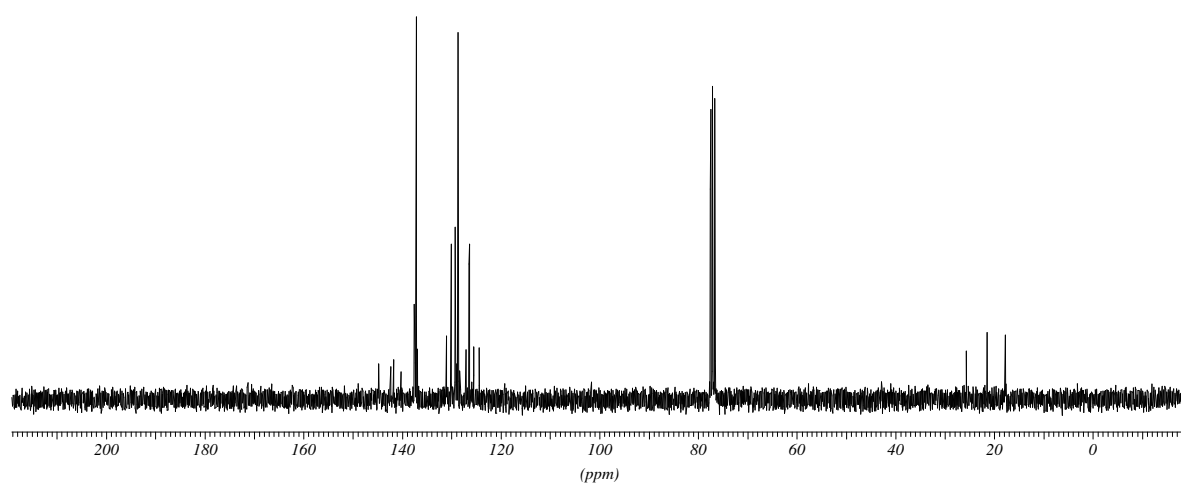

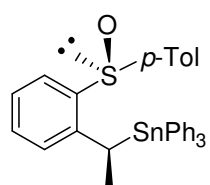

**5B**

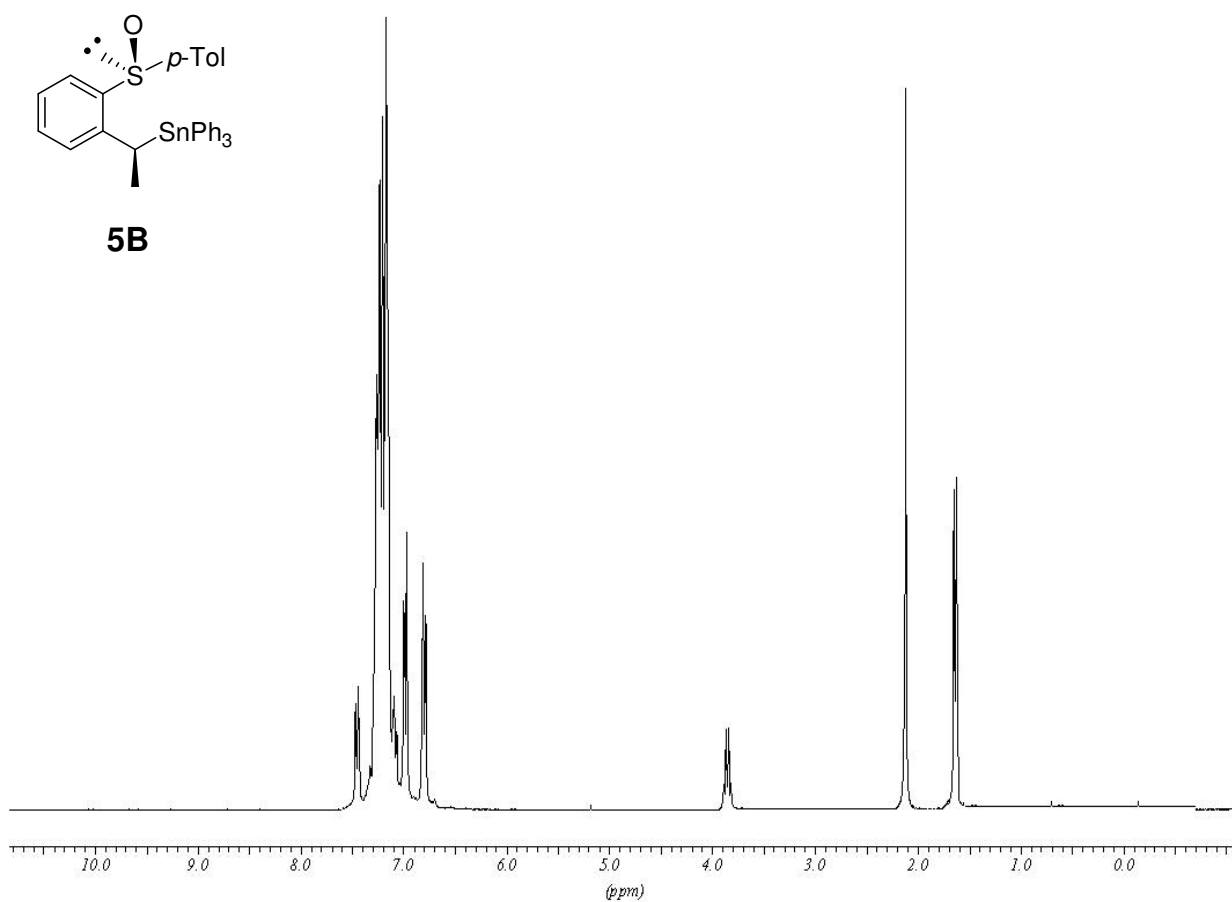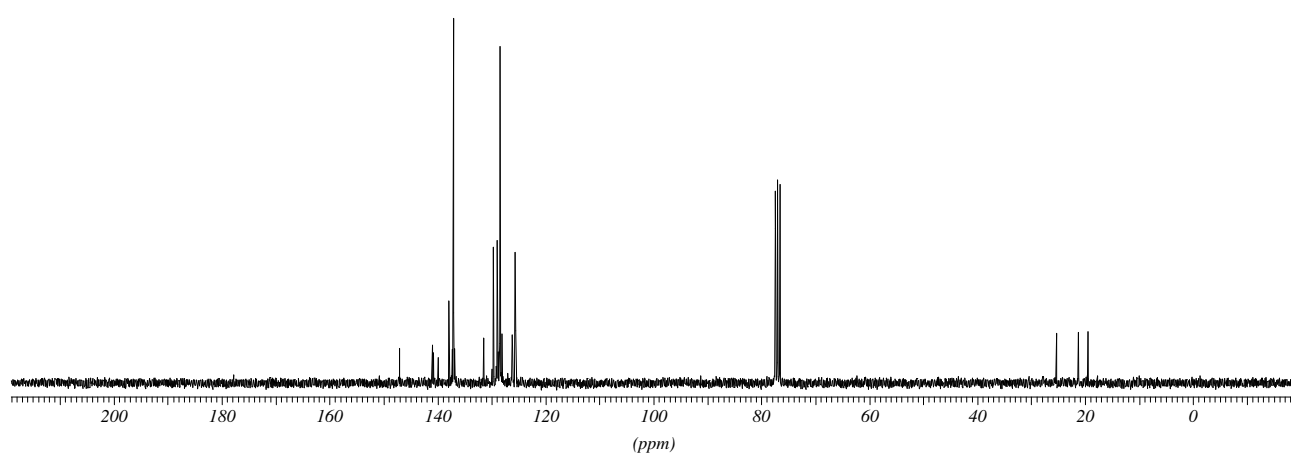

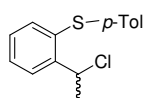

**6**

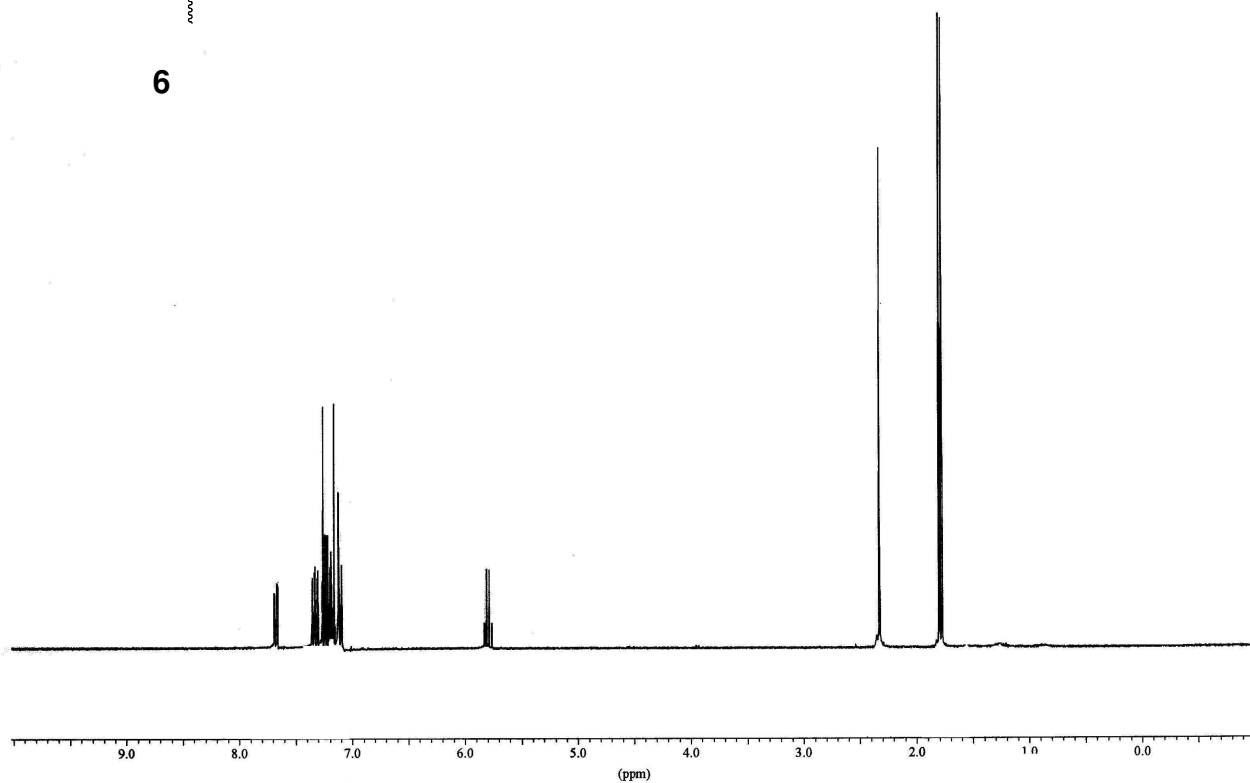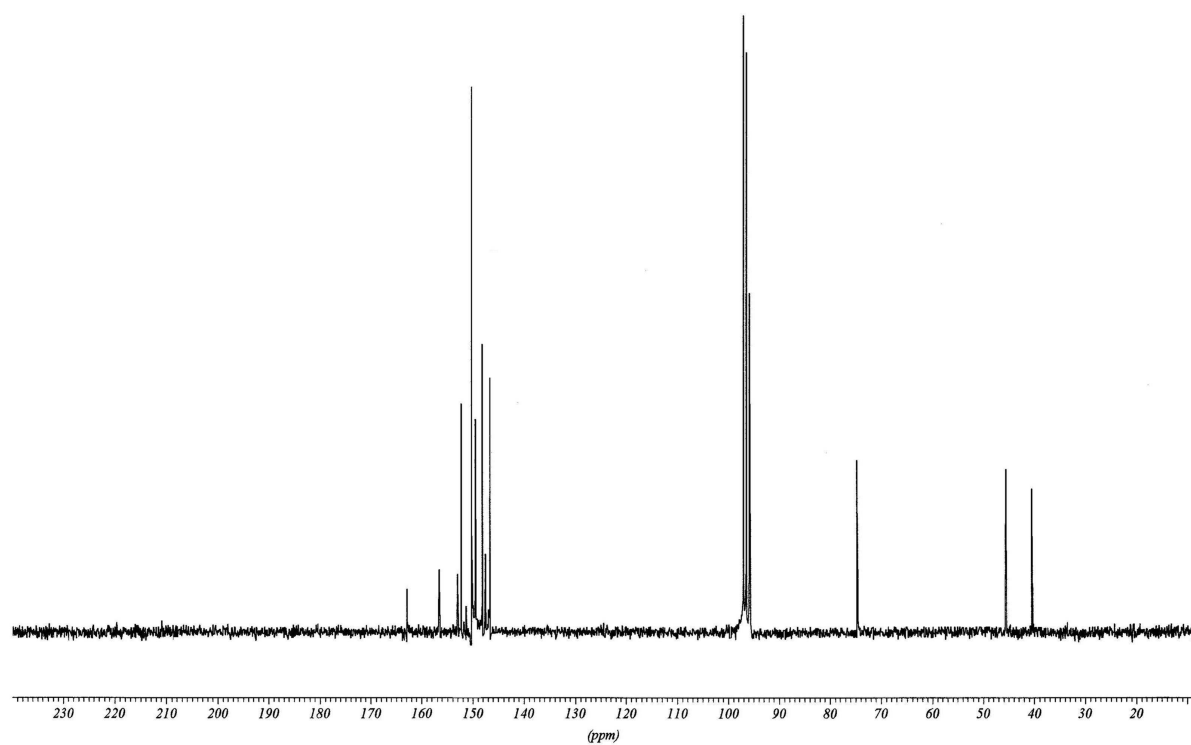

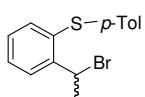

7

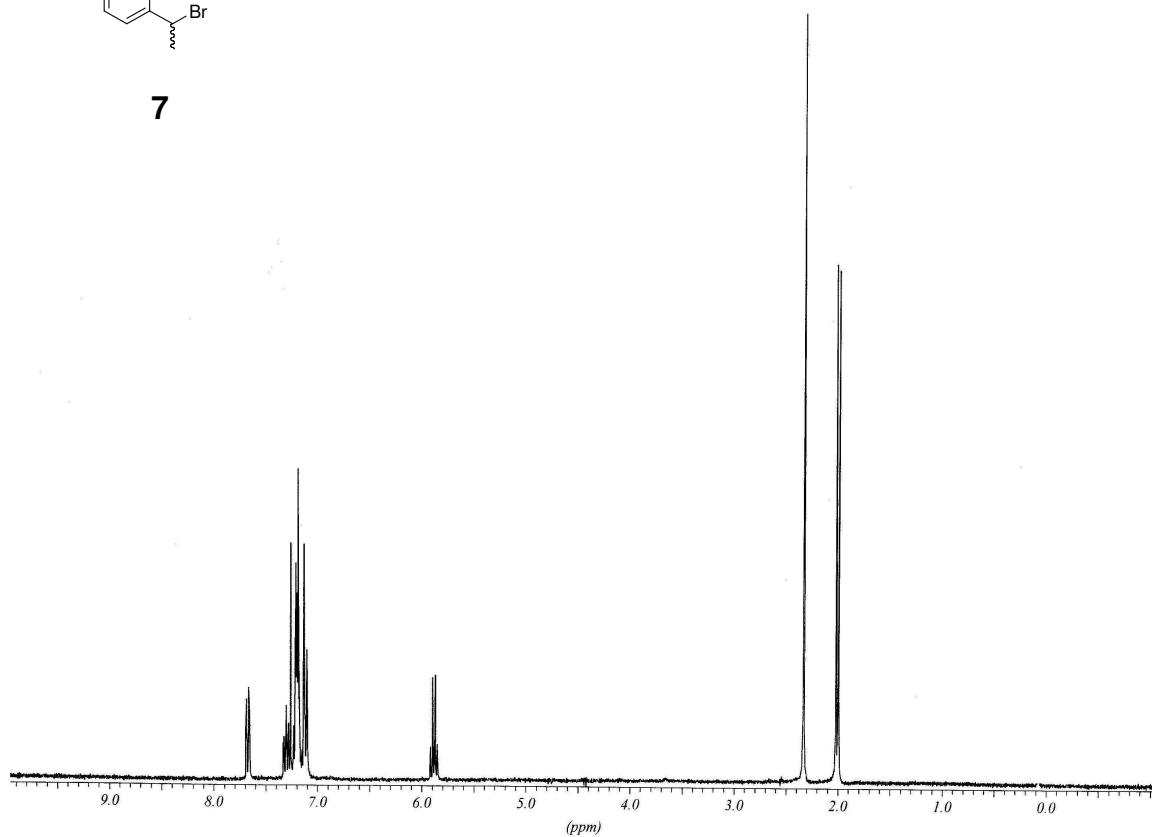



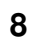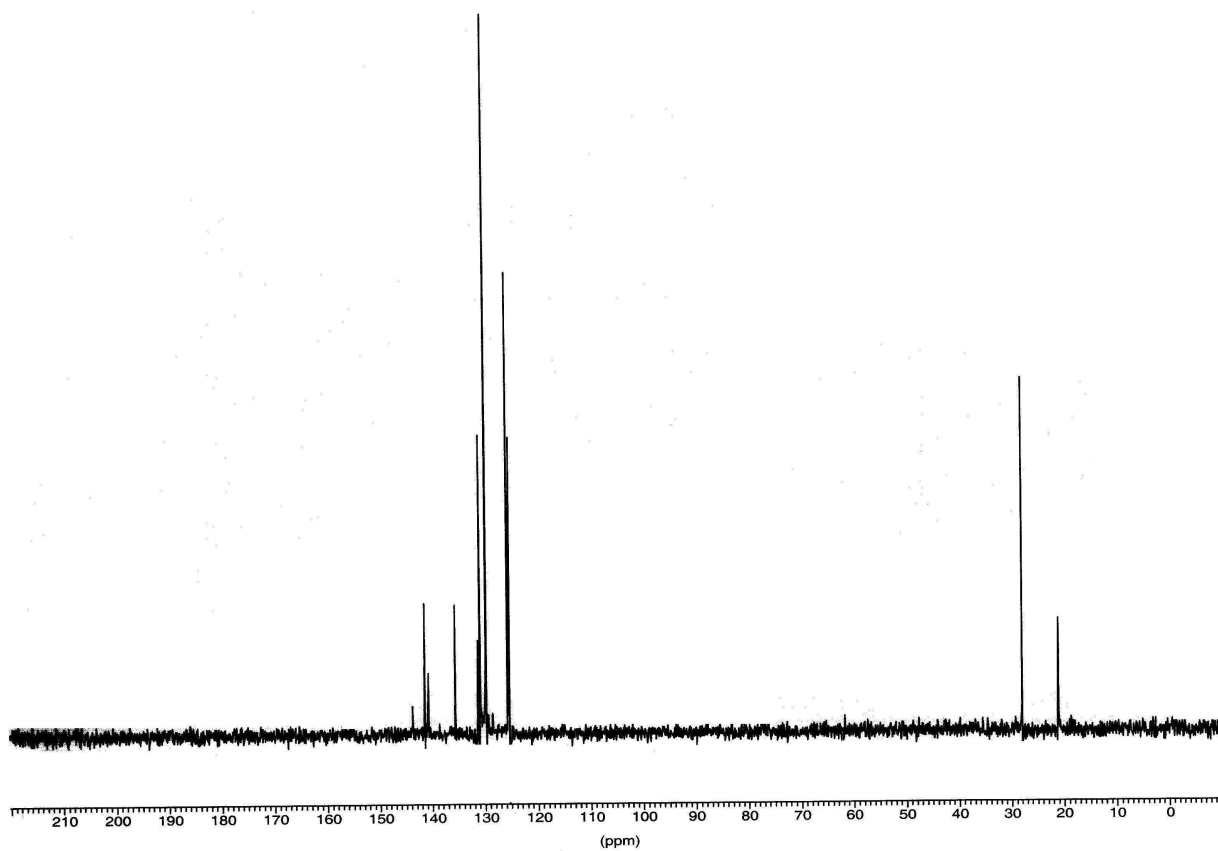

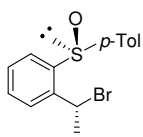

**9A**

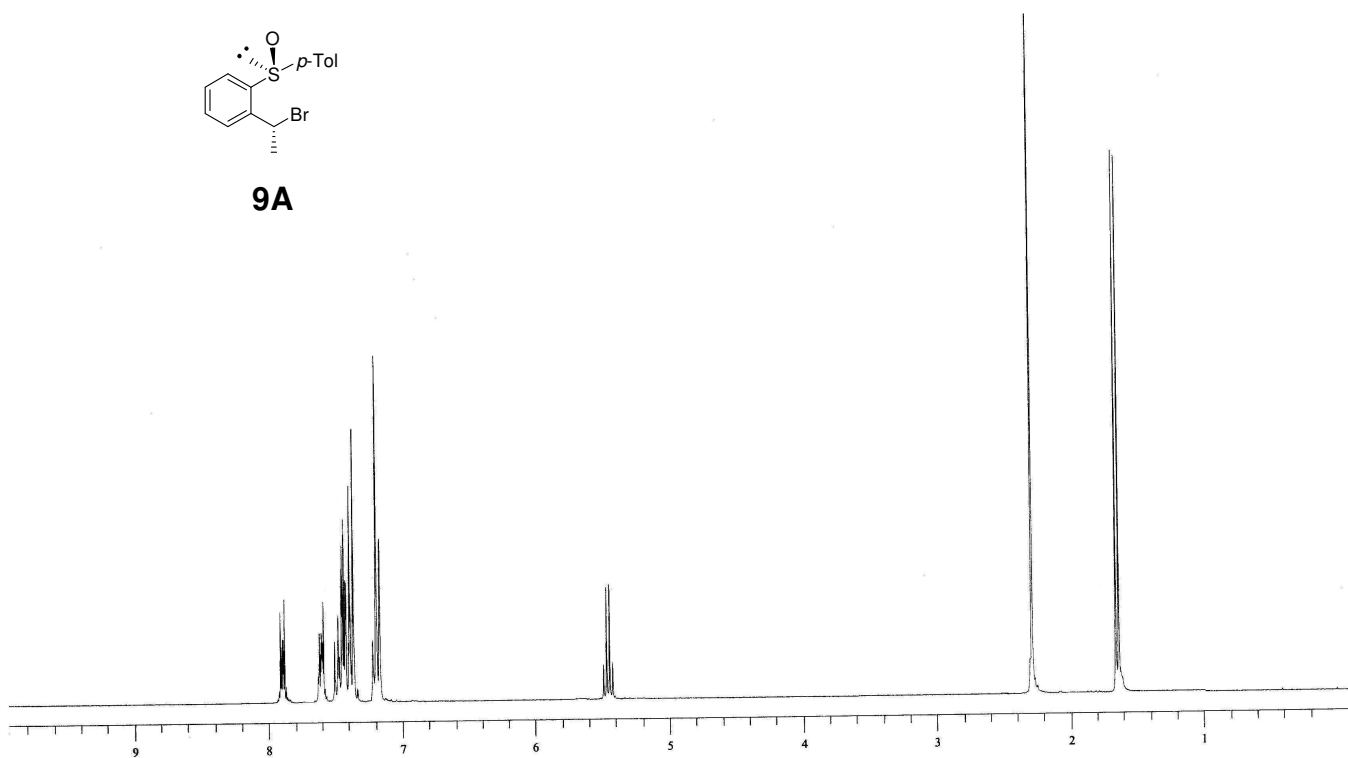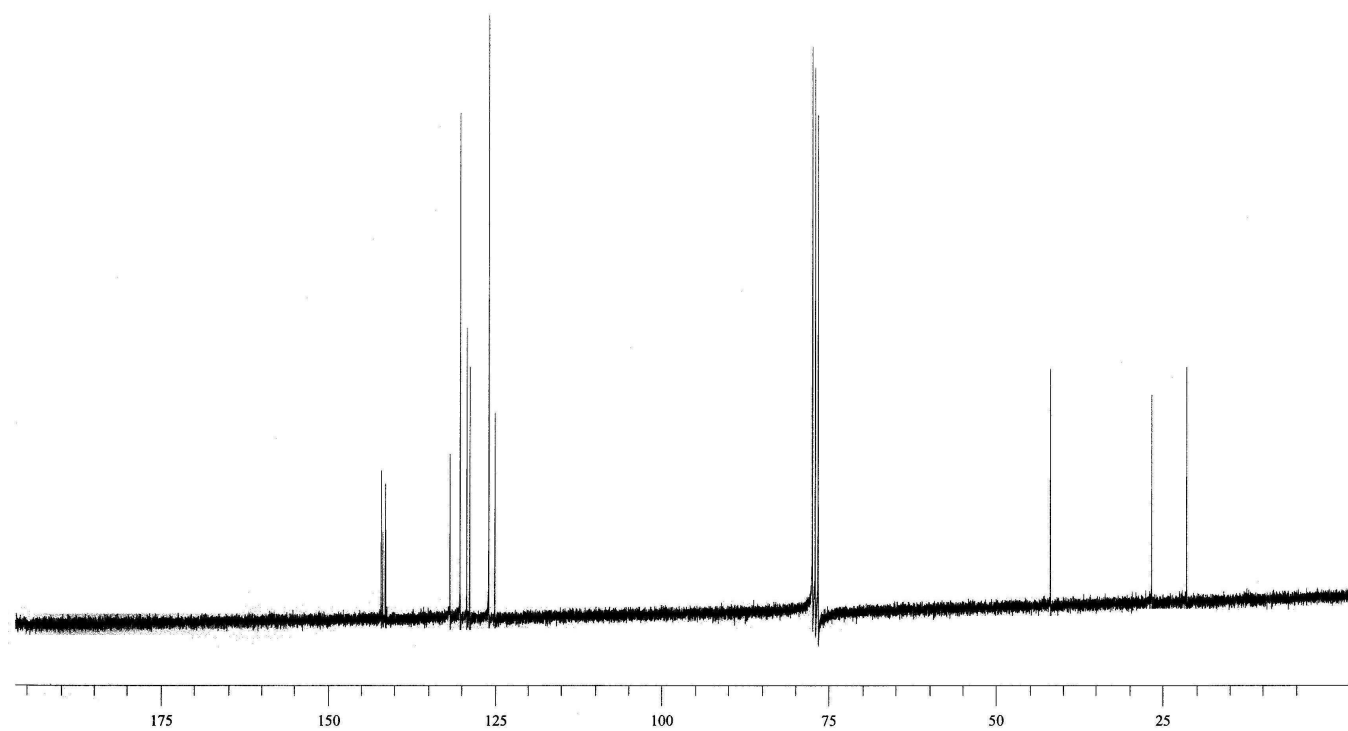

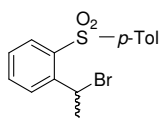

**(R)-10/(S)-10**

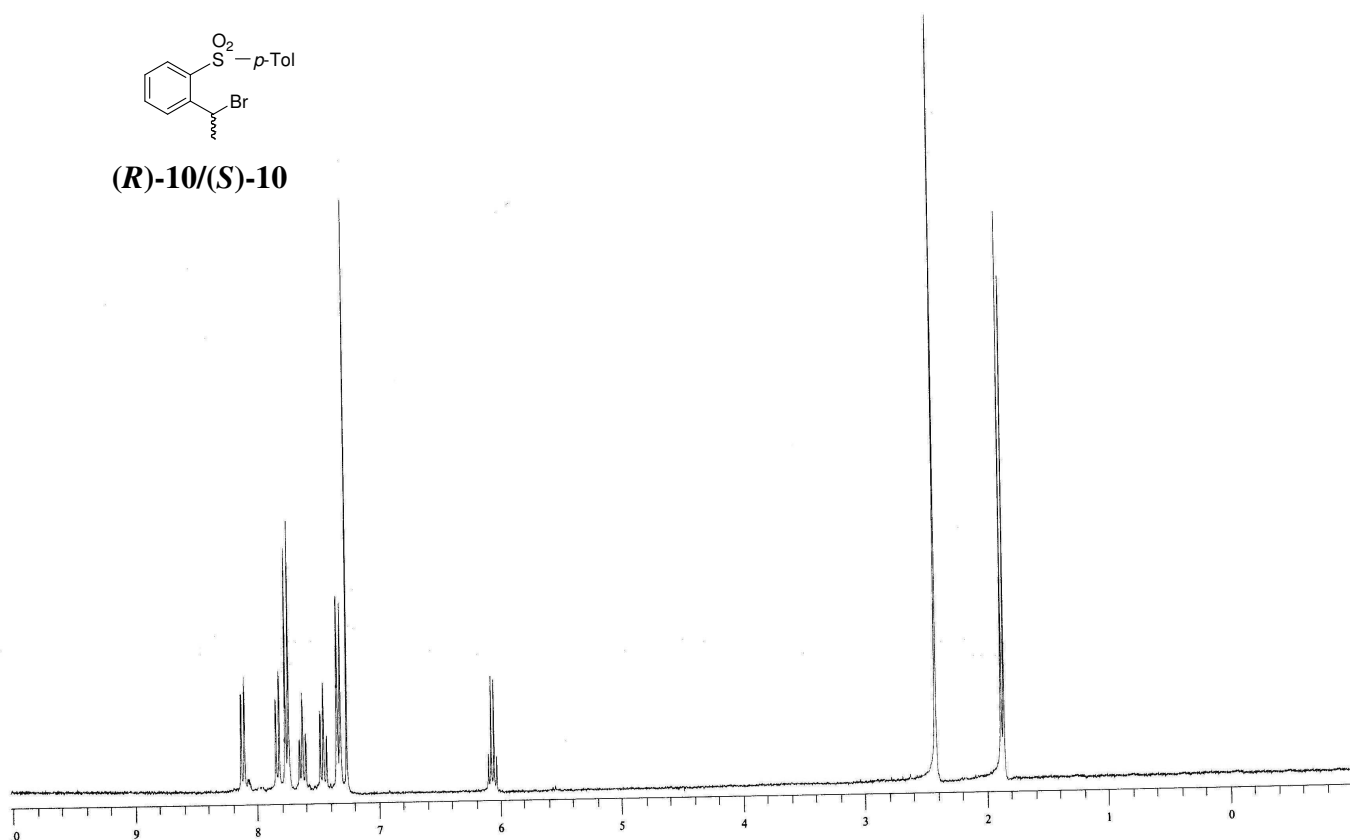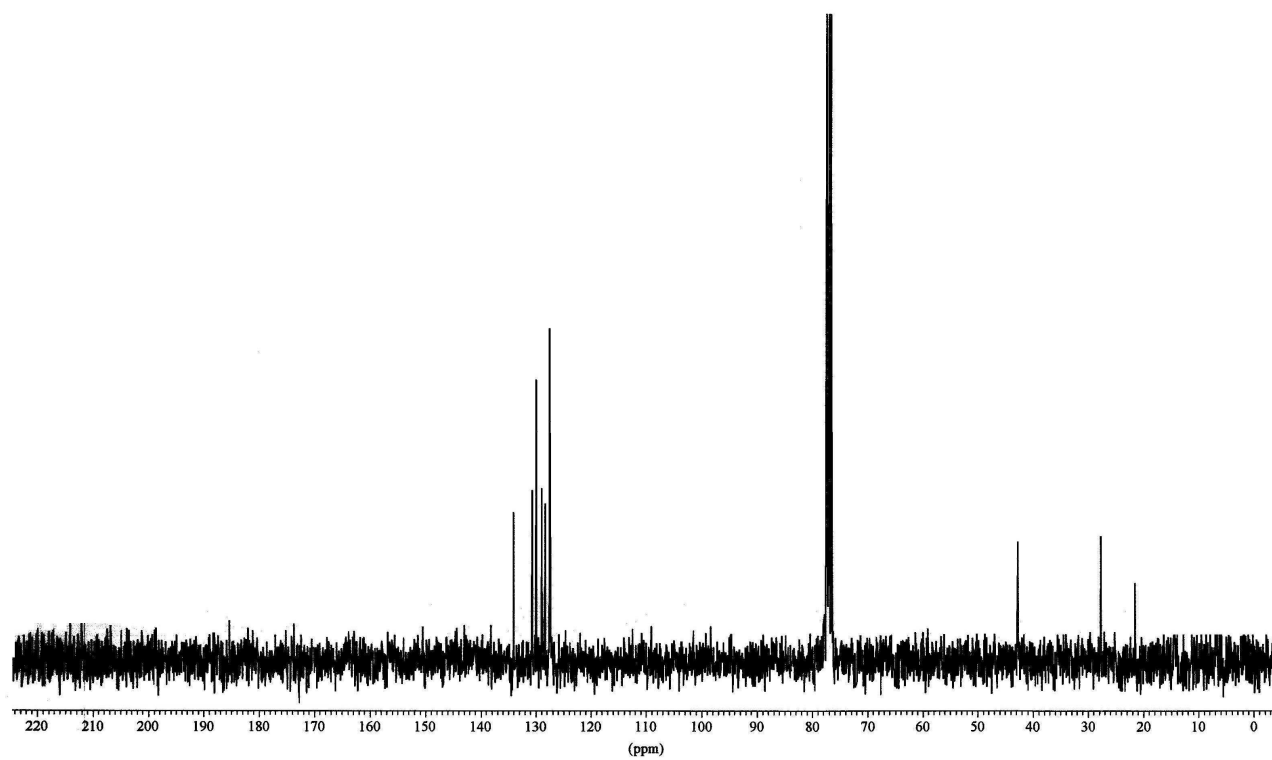

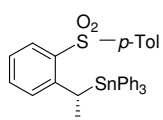

**(S)-11**

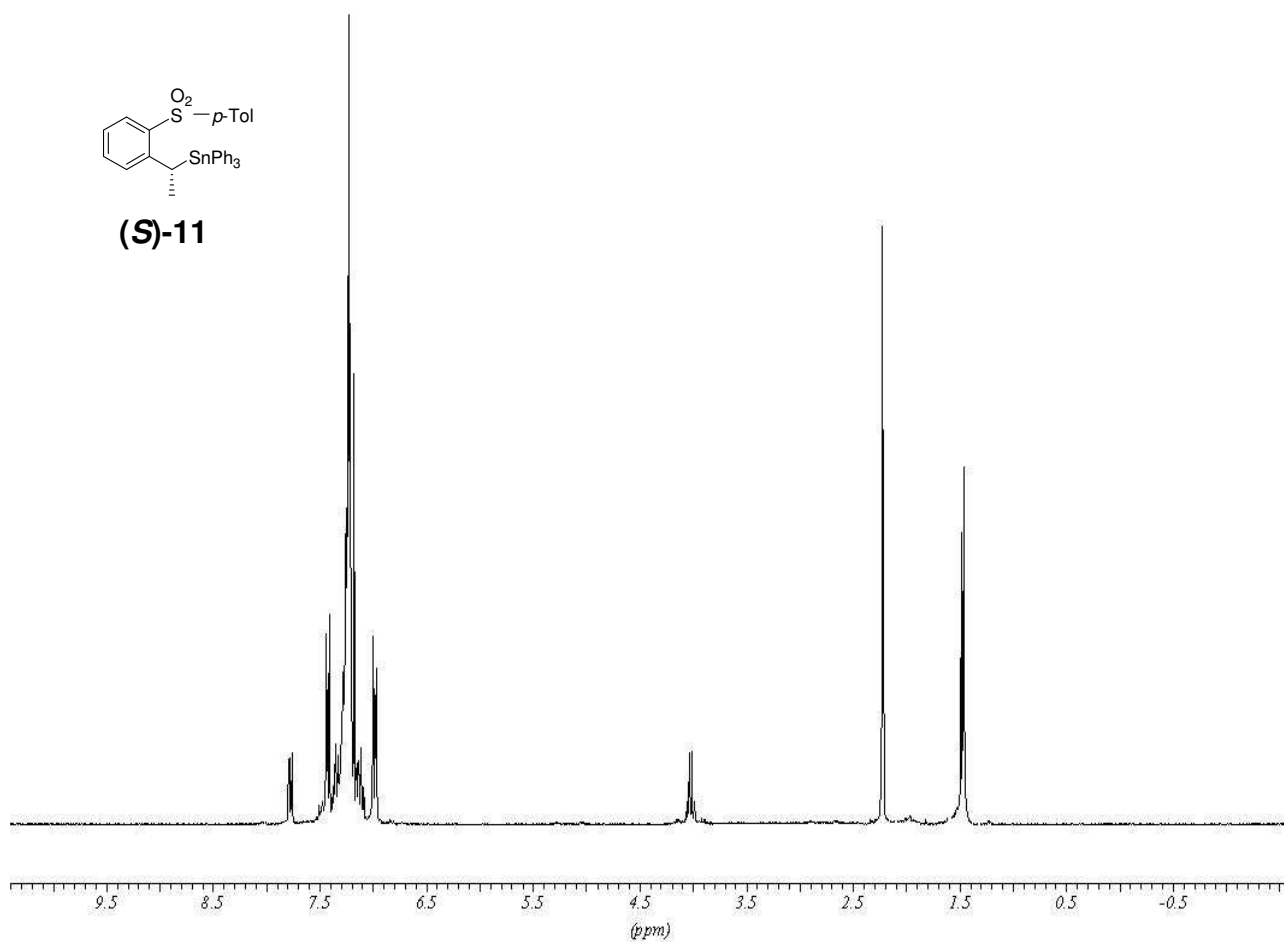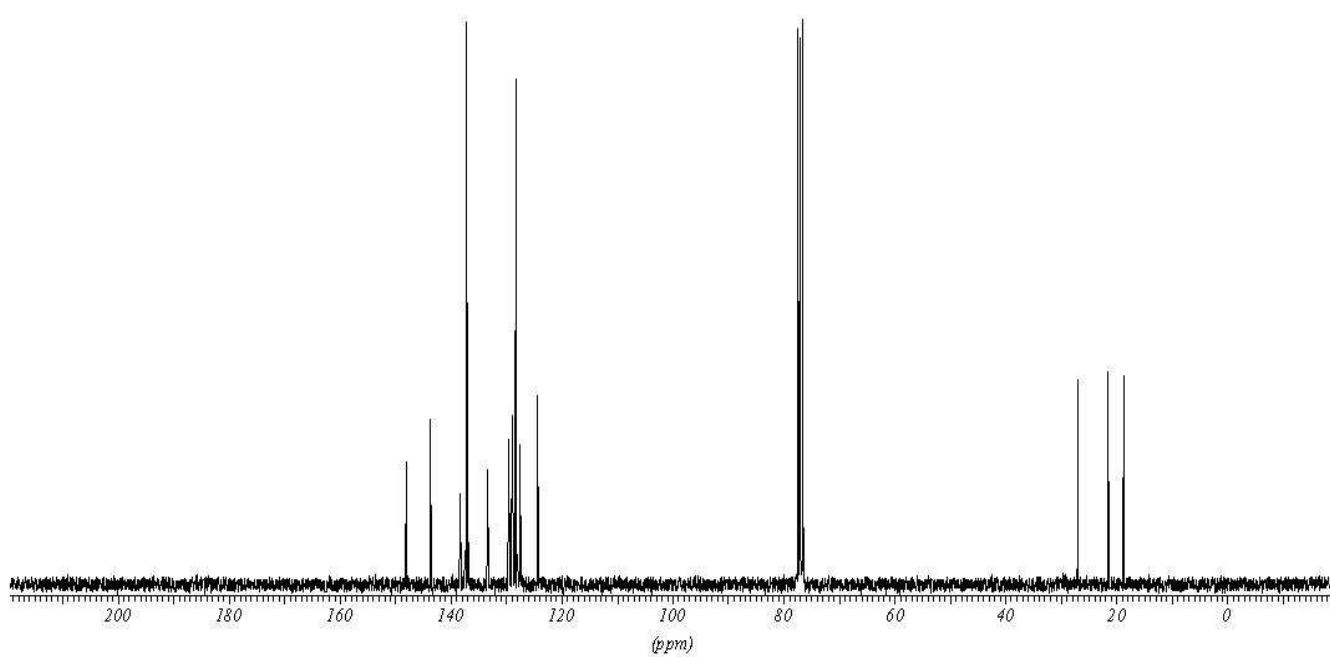

Supplement: Supplementary file 1 [file 4571167]
